# Supplementary material
Source: HighWire-hosted journal article supplement (https://cmajopen.ca/highwire/filestream/81281/field_highwire_adjunct_files/1/20200005-original-submission.pdf)
Supplement: 20200005-original-submission.pdf [file 20200005-original-submission.pdf]

## Diabetes-Induced Eye Disease Among First Nations People in Ontario, Canada: A Longitudinal, Population-Based Cohort Study

Robert J. Campbell, MD MSc<sup>1,2</sup>; Roseanne Sutherland, BSc<sup>3</sup>; Shahriar Khan, MSc<sup>2,4</sup>; Katharine M. Doliszny, PhD<sup>1</sup>; Philip L. Hooper, MD<sup>5</sup>; Morgan Slater, PhD<sup>6</sup>; Eliot Frymire, MA BEd<sup>2,7</sup>; Baiju R. Shah, MD PhD<sup>2,8</sup>; Jennifer D. Walker, PhD<sup>2,9</sup>; Michael E. Green, MD MPH<sup>2,6</sup>

### Author Affiliations:

1. Department of Ophthalmology, Queen's University and Kingston Health Sciences Centre, Kingston, Ontario, Canada;
2. Institute for Clinical Evaluative Sciences, Ontario, Canada;
3. Chiefs of Ontario; Ontario, Canada;
4. Centre for Studies in Primary Care, Queen's University, Kingston, Ontario, Canada;
5. Department of Ophthalmology, Western University and St. Joseph's Hospital, London, Ontario, Canada;
6. Department of Family Medicine, Queen's University, Kingston, Ontario, Canada;
7. Health Services and Policy Research Institute, Queen's University, Kingston, Ontario, Canada;
8. Department of Medicine, University of Toronto and Sunnybrook Health Sciences Centre, Toronto, Ontario, Canada;
9. School of Rural and Northern Health, Laurentian University, Sudbury, Ontario, Canada.

**Competing Interests:** No competing interests exists for any author.

**Financial Support:** This study was funded by an IMPACT award from the Ontario SPOR SUPPORT Unit, which is supported by the Canadian Institutes of Health Research and the Province of Ontario, the Brian Hennen Chair held by Dr. Michael Green and the David Barsky Chair held by Dr. Robert Campbell. ICES is funded by an annual grant from the Ontario Ministry of Health and Long-Term Care (MOHLTC).

**Role of the Sponsors:** The sponsor or funding organization had no role in the design or conduct of this research.

**Corresponding Author & Address for Reprint Requests:** Dr. Robert J. Campbell, Department of Ophthalmology, Hotel Dieu Hospital, 166 Brock Street, Kingston, Ontario, K7L 5G2, phone: (613) 544-3310 ext. 3189, fax: (613) 546-2731, email: rob.campbell@queensu.ca

**Word Count:** 1,936

**Number of Tables:** 1

**Number of Figures:** 4

**Supplements:** 4 figures

## ABSTRACT

**Background:** First Nations populations in Canada experience a higher incidence of diabetes and diabetes-related complications than other people. To date, little information has been available comparing utilization of preventive eye examinations and the need for interventional care for severe retinopathy among First Nations people and other people.

**Methods:** In collaboration with the Chiefs of Ontario, we carried out a population-based study to identify cohorts of First Nations and other people with diabetes in Ontario, Canada from 1995 to 2014. Linked databases were used to evaluate eye examination rates and severe DR treatment rates.

**Results:** Only 49.8% (95% CI: 48.9% - 50.7%) of First Nations people and 53.8% (95% CI: 53.7% - 54.0%) of other people with diabetes received an eye examination in 2014. First Nations people with diabetes developed severe DR at a faster rate than other people with diabetes (Hazard ratio 1.19 [95% CI: 1.02 - 1.38]). The gap between First Nations people and other people in the proportion requiring therapy for severe diabetic retinopathy was especially prominent among younger people.

**Interpretation:** Eye examination rates remain sub-optimal among people with diabetes in Ontario and were lower among First Nations people. This is particularly concerning in light of our other findings showing an increased risk of developing advanced DR and the accelerated rate of DR progression among First Nations people with diabetes.

*Diabetes-Induced Eye Disease Among First Nations People in Ontario, Canada:  
A Longitudinal Population-Based Cohort Study*

---

## INTRODUCTION

First Nations people in Canada experience a higher incidence of diabetes and diabetes-related complications than other people.(1-5) The reasons for this are complex and linked to the effects of colonization including persistent material deprivation, multigenerational trauma and long term stress.(6, 7) Among the many deleterious consequences of diabetes, diabetic retinopathy (DR) is the most common and is the leading cause of blindness and vision impairment in working-age adults.(8-10) DR is a progressive disorder and, of the more than 3 million Canadians with diabetes, over 60% will develop DR.(11-15) At advanced stages, DR leads to severe vision loss, which has profound effects on people's lives.(10, 16)

While the risk for developing DR is related to the degree of glycemic control (17, 18), the risk of developing poor vision outcomes due to advanced retinopathy can be reduced through regular eye examinations and early detection.(14, 19) However, ensuring access to regular eye examinations for the growing population with diabetes is challenging and First Nations people may be at higher risk of not receiving screening eye examinations for a number of reasons such as remoteness from care providers and comorbidity, as well as financial and cultural barriers.(1, 2) At advanced stages of retinopathy, interventions are required to prevent further vision loss. Although these treatments can be vision saving, they often indicate a failure of preventive efforts and are associated with poor vision outcomes. To date, little information has been available comparing utilization of eye examinations and the need for interventional care for severe retinopathy among First Nations people and other people. Hence, in collaboration with the Chiefs of Ontario, we carried out a population-based study to compare rates of eye examinations and interventional therapies to treat vision-threatening stages of DR among First Nations people with diabetes and other people with diabetes in Ontario.

## METHODS

We conducted a population-based, retrospective cohort study in Ontario, Canada from 1995-2014. Details of the study methods are published elsewhere.<sup>(20)</sup> Briefly, in each year of the study, people with diabetes in Ontario were identified using the Ontario Diabetes Database, a validated population-based dataset.<sup>(21)</sup> First Nations people were identified using the Indian Register (IR), which provides information on all Registered/Status First Nations people in Canada, and the remainder of the population was classified as other people in Ontario.<sup>(20)</sup>

The primary outcomes evaluated were the frequency of eye examinations and advanced DR treatments in each study year. To evaluate eye examinations, we used the Ontario Health Insurance Plan (OHIP) database, which includes information on all visits for eye examinations provided by ophthalmologists, family physicians and optometrists as well as telemedicine care. To assess the development of severe retinopathy, the OHIP database was used to identify procedures employed in the treatment of vision-threatening stages including intravitreal medication injections (e.g. for delivery of vascular endothelial growth factor inhibitors), laser retinal photocoagulation procedures and vitrectomy surgery. Covariates evaluated included age, sex, comorbidity (assessed using the Johns Hopkins Adjusted Diagnosis Groups), rurality (using the Rurality Index for Ontario) and, for First Nations people, living in or outside of a First Nations community. Details of the codes used to identify eye examination visits and procedures are listed in Table S1 (online supplementary material).

To further compare the rates at which First Nations people and other people develop the need for interventions for advanced DR, a Cox proportional hazards model was used to evaluate the time from diagnosis of diabetes to first DR treatment among First Nations people and other people diagnosed with diabetes during the study period, adjusting for age and sex.

In 2004, OHIP policies regarding the coverage of routine eye exams were changed, therefore, the evaluation of eye examination frequency was limited to a ten-year period from 2005-2014. For eye examination data, unadjusted rates were evaluated to reflect adherence to DR care guidelines, which recommend regular eye examinations for people with diabetes irrespective of age and sex.<sup>(14)</sup> For interventional care outcomes, age and sex standardized rates were calculated in order to adjust for differences both between and within populations over time.

Analyses were conducted using SAS Enterprise Guide version 7.1 (Cary, NC). This project received approvals from the Chiefs of Ontario Data Governance Committee and the Research Ethics Boards of Queen's University and Laurentian University. The report structure follows "reporting of studies conducted using observational routinely-collected data" (RECORD) & "strengthening the reporting of observational studies in epidemiology" (STROBE) guidelines.

*Diabetes-Induced Eye Disease Among First Nations People in Ontario, Canada:  
A Longitudinal Population-Based Cohort Study*

---

## RESULTS

First Nations people with diabetes were significantly younger, more likely to be female and less likely to live in urban areas than other people with diabetes included in the study (Table 1).

During the study period, there was sub-optimal utilization of eye examinations among both First Nations people and other people with diabetes, with only about half the population receiving an eye examination within the previous year and only two thirds receiving an eye examination in the previous 2-year period (Figures 1 and S1). For example, only 49.8% (95% CI: 48.9% - 50.7%) of First Nations people and 53.8% (95% CI: 53.7% - 54.0%) of other people with diabetes receiving an eye examination in 2014. Further, First Nations people with diabetes were less likely than other people with diabetes to receive an eye examination (Figures 1 and S1). Encouragingly, the proportion of First Nations people with diabetes who received an eye examination during the previous year increased from 43% to 50% between 2005 and 2014, mirroring a similar increase among other people with diabetes. Eye examination rates were similar for First Nations people with diabetes regardless of whether they lived in or outside a First Nations community (Figure S2). In both populations, younger people were less likely to undergo eye examinations than their older counterparts (Figure S3). Up through the age of 80 years, the proportion of people with diabetes receiving eye examinations increased with age. Beyond 80 years of age the proportion dropped significantly in both population groups.

First Nations people with diabetes were more likely to develop advanced DR requiring treatment, particularly in later study years (Figure 2). There were no significant differences in DR treatment rates in First Nations people stratified by place of residence (living in versus outside a First Nations community) (Figure S4). The differences between First Nations people and other people in the proportion requiring therapy for DR was especially prominent among younger people (Figure 3). For example, in the 30-49 years age group 1.8% of First Nations people required treatment in 2014, compared to 0.9% of other people requiring treatment in the same year.

Finally, in the analysis of time from diabetes diagnosis to first DR treatment, the rate of progression to severe DR requiring therapy was approximately 20% higher among First Nations people with diabetes than among other people with diabetes (hazard ratio: 1.19; 95% confidence interval: 1.02 to 1.38; Figure 4). Overall, approximately 4% of First Nations people with diabetes required therapy for DR within 10 years of diagnosis.

## INTERPRETATION

Diabetes is a common disease with serious consequences including the risk of blindness if not carefully managed. As part of a comprehensive, population-based study on diabetes and its consequences in the First Nations population of Ontario, this study compared temporal trends in eye examination frequency, a measure of advanced DR prevention, and DR treatment rates, a measure of eye-related diabetes complications, between First Nations people and other people. We found that preventative eye examination access and uptake is suboptimal among all Ontarians and is worse among First Nations people. Even when the screening interval was set at the upper limit of guideline recommendations, approximately one-third of diabetics from either population group failed to undergo eye examinations. We also found that First Nations people are more likely to require interventions for advanced stages of DR and that this gap has widened recently. Moreover, First Nations people progressed to advanced stages of DR at a faster rate than other people in Ontario leading to strikingly higher need for interventional DR treatment among younger First Nations people.

The current finding of lower than expected eye examination rates is consistent with other First Nations population studies (22, 23) and other population-based surveys.(14, 24, 25) While all people diagnosed with diabetes in Ontario are afforded annual eye examinations under the Ontario Health Insurance Plan (OHIP), impediments to screening, in the overall population and in First Nations populations specifically, have persisted over time. Our finding that First Nations people with diabetes developed advanced stages of DR requiring interventional therapy at a higher rate than other people also parallels findings from previous reports.(1, 5, 23, 26-28) The development of DR can imply inadequate prevention measures, such as infrequent eye screening or inadequate control of glucose, blood pressure and lipids. Other work by our group shows that glycemic control is significantly worse in First Nations people with diabetes regardless of location of residence or rurality, while lipid control is better in First Nations people than in other people in Ontario with diabetes.(29) Previous studies have also shown that programs to support tight control of blood glucose and other risk factors such as blood pressure and lipid profile could reduce progression of DR among First Nations people.(27, 30) Achieving these improvements among those most at risk, however, has proven to be complex and challenging.(27) Our finding that younger First Nations people with diabetes were particularly at risk is concerning and deserves additional study. Furthermore, the finding that people with newly-diagnosed diabetes in the First Nations population require treatment for DR earlier than their non-First Nation counterparts, underlines the importance of enhanced DR screening, risk factor control and additional work to design programs tailored to the unique situations of First Nations people to reduce the onset of DR.(1)

There are several limitations to this study. First, we assumed that visits to care providers for an eye examination would include examination of the retina to evaluate the presence of DR; however, it is not possible to confirm from the data whether a full examination was actually provided. However, given the importance of DR, it is likely that eye examinations for people with diabetes did in fact include screening for DR as indicated. Second, quantification of eye care services was based on fee-for-service claims captured in the public insurance program

*Diabetes-Induced Eye Disease Among First Nations People in Ontario, Canada:  
A Longitudinal Population-Based Cohort Study*

---

(OHIP) and does not include examinations reimbursed solely from private insurance. Although people with diabetes are entitled to have their visits covered through the public insurance program, we cannot exclude the possibility that some visits were not captured. Third, the Ontario Diabetes Database does not distinguish between type 1 and type 2 diabetes, which may differ in proportion among populations. Fourth, potential barriers to care such as travel, missed work, child and elder care duties and cultural barriers were not directly evaluated in our study.(2, 14) Fifth, some people in north-western Ontario may have received care in Manitoba and would not have been captured. This would affect only a small proportion of people and would be unlikely to affect our overall conclusions.

Through the use of a large healthcare administrative data base, our study has added to our understanding of temporal trends in preventive care and management of DR in First Nations people and other people in Ontario. Further analysis is needed to uncover factors that could contribute to our understanding of suboptimal screening rates in both population cohorts, including health care provider availability, the use of telemedicine, financial barriers and clinical factors. Additional study will also be needed to understand both the increased risk of developing advanced DR and the accelerated rate of DR progression in First Nations people with diabetes. This population-based study provides policymakers, healthcare providers and people with diabetes with an enhanced understanding of diabetes and its life-altering complications.

## REFERENCES

1. Harris SB, Tompkins JW, TeHiwi B. Call to action: A new path for improving diabetes care for Indigenous peoples, a global review. *Diabetes Res Clin Pract.* 2017;123:120-33.
2. Diabetes Canada Clinical Practice Guidelines Expert Committee, Crowshoe L, Dannenbaum D, Green M, Henderson R, Hayward MN, et al. Type 2 Diabetes and Indigenous Peoples. *Can J Diabetes.* 2018;42 Suppl 1:S296-S306.
3. Pelletier C, Dai S, Roberts KC, Bienek A, Onysko J, Pelletier L. Report summary. Diabetes in Canada: facts and figures from a public health perspective. *Chronic Dis Inj Can.* 2012;33(1):53-4.
4. Booth GL, Hux JE, Fang J, Chan BT. Time trends and geographic disparities in acute complications of diabetes in Ontario, Canada. *Diabetes Care.* 2005;28(5):1045-50.
5. Hanley AJ, Harris SB, Mamakeesick M, Goodwin K, Fiddler E, Hegele RA, et al. Complications of type 2 diabetes among aboriginal Canadians: prevalence and associated risk factors. *Diabetes Care.* 2005;28(8):2054-7.
6. Greenwood M, Leeuw, S de, Lindsay, N.M. Determinants of Indigenous Peoples' Health in Canada: Beyond the Social. 2nd ed. Toronto: Canadian Scholars' Press Inc; 2015.
7. King M, Smith A, Gracey M. Indigenous health part 2: the underlying causes of the health gap. *Lancet.* 2009;374(9683):76-85.
8. Kempen JH, O'Colmain BJ, Leske MC, Haffner SM, Klein R, Moss SE, et al. The prevalence of diabetic retinopathy among adults in the United States. *Arch Ophthalmol.* 2004;122(4):552-63.
9. Canadian National Institute for the Blind and Canadian Ophthalmology Society. The Cost of Vision in Canada: A summary report. Toronto; 2009.
10. Diabetes Canada. Diabetes in Canada 2019, January [Available from: <https://www.diabetes.ca/DiabetesCanadaWebsite/media/About-Diabetes/DiabetesCharter/2019-Backgrounder-Canada.pdf>].
11. Antonetti DA, Klein R, Gardner TW. Diabetic retinopathy. *N Engl J Med.* 2012;366(13):1227-39.
12. Cheung N, Mitchell P, Wong TY. Diabetic retinopathy. *Lancet.* 2010;376(9735):124-36.
13. Yau JW, Rogers SL, Kawasaki R, Lamoureux EL, Kowalski JW, Bek T, et al. Global prevalence and major risk factors of diabetic retinopathy. *Diabetes Care.* 2012;35(3):556-64.
14. Hooper P, Boucher MC, Cruess A, Dawson KG, Delpero W, Greve M, et al. Canadian Ophthalmological Society evidence-based clinical practice guidelines for the management of diabetic retinopathy. *Can J Ophthalmol.* 2012;47(2 Suppl):S1-30, S1-54.
15. Public Health Agency of Canada. Chapter 6: Diabetes among First Nations, Inuit, and Metis populations Ottawa, ON: Public Health Agency of Canada; 2012.
16. Brown MM, Brown GC, Sharma S, Kistler J, Brown H. Utility values associated with blindness in an adult population. *Br J Ophthalmol.* 2001;85(3):327-31.
17. The relationship of glycemic exposure (HbA1c) to the risk of development and progression of retinopathy in the diabetes control and complications trial. *Diabetes.* 1995;44(8):968-83.



*Diabetes-Induced Eye Disease Among First Nations People in Ontario, Canada:  
A Longitudinal Population-Based Cohort Study*

---

18. Stratton IM, Adler AI, Neil HA, Matthews DR, Manley SE, Cull CA, et al. Association of glycaemia with macrovascular and microvascular complications of type 2 diabetes (UKPDS 35): prospective observational study. *BMJ*. 2000;321(7258):405-12.
19. Diabetes Canada Clinical Practice Guidelines Expert Committee, Altomare F, Kherani A, Lovshin J. Retinopathy. *Can J Diabetes*. 2018;42 Suppl 1:S210-6.
20. Slater M, Shah B, Khan S, Jones C, Sutherland R, Jacklin K, et al. Reducing the burden of diabetes in First Nations people in Ontario: methods for a longitudinal population-based cohort study. *CMAJ Open*. 2019.
21. Hux JE, Ivis F, Flintoft V, Bica A. Diabetes in Ontario: determination of prevalence and incidence using a validated administrative data algorithm. *Diabetes Care*. 2002;25(3):512-6.
22. Kaur H, Maberley D, Chang A, Hay D. The current status of diabetes care, diabetic retinopathy screening and eye-care in British Columbia's First Nations Communities. *Int J Circumpolar Health*. 2004;63(3):277-85.
23. Tennant M, Greve M, Rudnisky C, Hillson T, Hinz B. Identification of diabetic retinopathy by stereoscopic digital imaging via teleophthalmology: a comparison to slide film. *Can J Ophthalmol*. 2001;36:187-96.
24. Booth G, Polsky J, Gozdyra P, Cauch-Dudek K, Kiran T, Shah B, et al. Regional measures of diabetes burden in Ontario. Toronto: Institute for Clinical Evaluative Sciences; 2012.
25. Rudnisky CJ, Tennant MTS, Johnson JA, Balko SU. Chapter 9: Diabetes and eye disease in Alberta. Edmonton, AB: Institute of Health Economics; 2011.
26. Ross SA, McKenna A, Mozejko S, Fick GH. Diabetic Retinopathy in Native and Nonnative Canadians. *Experimental Diabetes Research* [Internet]. 2007 23 Apr 2019.
27. Rudnisky CJ, Wong BK, Virani H, Tennant MTS. Risk factors for progression of diabetic retinopathy in Alberta First Nations communities. *Can J Ophthalmol*. 2017;52 Suppl 1:S19-S29.
28. Jin AJ, Martin D, Maberley D, Dawson KG, Seccombe DW, Beattie J. Evaluation of a mobile diabetes care telemedicine clinic serving Aboriginal communities in northern British Columbia, Canada. *International Journal of Circumpolar Health*. 2004;63(sup2):124-8.
29. Green M, Shah B, Slater M, Khan S, Jones CR, Walker JD. Monitoring, treatment and control of blood sugar and lipids in Ontario First Nations' people with Diabetes: a longitudinal population-based cohort study. *CMAJ*. 2019.
30. Maberley D, King W, Creuss A, Koushik A. Risk factors for diabetic retinopathy in the Cree of James Bay. *Ophthalmic Epidemiol*. 2002;9(3):153-67.

## ACKNOWLEDGMENTS/DISCLOSURES/STATEMENTS

**A. Funding/Support:** This study received funding from an IMPACT Award from the Ontario SPOR SUPPORT Unit (OSSU), the Brian Hennan Chair held by Dr Michael Green and the David Barsky Chair held by Dr. Robert Campbell. This study was supported by ICES, which is funded by an annual grant from the Ontario Ministry of Health and Long-Term Care (MOHLTC). The analyses, conclusions, opinions and statements expressed herein are solely those of the authors and do not reflect those of the funding or data sources; no endorsement is intended or should be inferred.

### **B. Chiefs of Ontario**

Our partner from the early design, implementation and final write of the project was the Chiefs of Ontario. Their many member contributions were key to the success and quality over the 5 years of this project.

### **C. Patient Advisor Group**

Members of our Patient Advisory Committee provided insightful and thoughtful input for this project. Their advice made a significant contribution in shaping both the work and this report.

### **D. First Nation Communities**

The authors wish to acknowledge the First Nation individuals living with diabetes who shared their personal stories related to the study findings.

**E. Financial Disclosures:** None of the authors have any financial disclosures.

**F. Conflicts of Interest:** None of the authors have any conflicts of interest to disclose.

**G. Data Access and Responsibility:** In accordance with the Personal Health Information Protection Act (PHIPA) of Ontario, the raw administrative data used for statistical analyses in this manuscript may only be accessed by agents of the Institute for Clinical Evaluative Sciences (ICES), a prescribed entity under Section 45 of the Act, for the purposes of conducting research that contributes to the effectiveness, quality, equity and efficiency of health care and health services. Dr. R.J. Campbell is an agent of ICES and had full control over the data definitions and analyses used in this manuscript. Dr. R.J. Campbell had full access to all the data in the study and takes responsibility for the integrity of the data and the accuracy of the data analysis.

**H. Role of the Sponsors:** The Sponsors of this study had no role in the design and conduct of the study; collection, management, analysis, and interpretation of the data; preparation, review, or approval of the manuscript; and the decision to submit for publication. This study was supported by the Institute for Clinical Evaluative Sciences (ICES), which is funded by an annual grant from the Ontario Ministry of Health and Long Term Care (MOHLTC). The opinions, results and conclusions reported in this paper are those of the authors and are independent from the funding sources. No endorsement by ICES or the Ontario MOHLTC is intended or should be inferred.

Table 1. Demographic characteristics of First Nations people and other people in Ontario with and without diabetes, 2014 <sup>a,b</sup>

| Variable              | Value             | Other People    |                   | First Nations People |                | First Nations People - In Community |                | First Nations People - Outside Community |                |
|-----------------------|-------------------|-----------------|-------------------|----------------------|----------------|-------------------------------------|----------------|------------------------------------------|----------------|
|                       |                   | with diabetes   | overall           | with diabetes        | overall        | with diabetes                       | overall        | with diabetes                            | overall        |
|                       |                   | N=1,364,222     | N=13,454,157      | N=23,013             | N=160,578      | N=8,914                             | N=56,215       | N=14,098                                 | N=104,323      |
| Sex                   | Female            | 655,137 (48.0%) | 6,853,014 (50.9%) | 12,324 (53.6%)       | 79,887 (49.7%) | 4,649 (52.2%)                       | 26,884 (47.8%) | 7,675 (54.4%)                            | 52,982 (50.8%) |
|                       | Male              | 709,085 (52.0%) | 6,601,143 (49.1%) | 10,689 (46.4%)       | 80,691 (50.3%) | 4,265 (47.8%)                       | 29,331 (52.2%) | 6,423 (45.6%)                            | 51,341 (49.2%) |
| Age                   | 0-19              | 11,558 (0.8%)   | 3,026,961 (22.5%) | 289 (1.3%)           | 48,337 (30.1%) | 110 (1.2%)                          | 19,154 (34.1%) | 179 (1.3%)                               | 29,165 (28.0%) |
|                       | 20-34             | 42,554 (3.1%)   | 2,665,604 (19.8%) | 1,615 (7.0%)         | 40,496 (25.2%) | 622 (7.0%)                          | 12,965 (23.1%) | 993 (7.0%)                               | 27,525 (26.4%) |
|                       | 35-49             | 190,115 (13.9%) | 2,821,609 (21.0%) | 5,655 (24.6%)        | 33,500 (20.9%) | 2,229 (25.0%)                       | 10,881 (19.4%) | 3,426 (24.3%)                            | 22,608 (21.7%) |
|                       | 50-64             | 472,041 (34.6%) | 2,828,926 (21.0%) | 9,239 (40.1%)        | 26,811 (16.7%) | 3,543 (39.7%)                       | 9,095 (16.2%)  | 5,695 (40.4%)                            | 17,712 (17.0%) |
|                       | 65-74             | 337,383 (24.7%) | 1,170,125 (8.7%)  | 4,108 (17.9%)        | 7,657 (4.8%)   | 1,597 (17.9%)                       | 2,736 (4.9%)   | 2,511 (17.8%)                            | 4,921 (4.7%)   |
|                       | 75+               | 310,571 (22.8%) | 940,932 (7.0%)    | 2,107 (9.2%)         | 3,777 (2.4%)   | 813 (9.1%)                          | 1,384 (2.5%)   | 1,294 (9.2%)                             | 2,392 (2.3%)   |
| Rurality <sup>c</sup> | Urban (0-9)       | 989,738 (72.5%) | 9,829,035 (73.1%) | 6,278 (27.3%)        | 50,852 (31.7%) | 97 (1.1%)                           | 622 (1.1%)     | 6,181 (43.8%)                            | 50,212 (48.1%) |
|                       | Sub-urban (10-39) | 262,088 (19.2%) | 2,580,133 (19.2%) | 4,588 (19.9%)        | 31,742 (19.8%) | 1,192 (13.4%)                       | 6,563 (11.7%)  | 3,395 (24.1%)                            | 25,174 (24.1%) |
|                       | Rural (40+)       | 103,251 (7.6%)  | 958,797 (7.1%)    | 3,865 (16.8%)        | 25,822 (16.1%) | 1,149 (12.9%)                       | 7,328 (13.0%)  | 2,716 (19.3%)                            | 18,487 (17.7%) |
|                       | Missing           | 9,145 (0.7%)    | 86,192 (0.6%)     | 8,282 (36.0%)        | 52,162 (32.5%) | 6,476 (72.6%)                       | 41,702 (74.2%) | 1,806 (12.8%)                            | 10,450 (10.0%) |

<sup>a</sup> Data presented as number (%)<sup>b</sup> Within each variable, percentages add to 100% by column<sup>c</sup> Rurality Index of Ontario

*Diabetes-Induced Eye Disease Among First Nations People in Ontario, Canada:  
A Longitudinal Population-Based Cohort Study*

**Figure 1** Proportion of individuals with diabetes receiving an eye examination, among First Nations people and other people in Ontario, 2005–2014\*

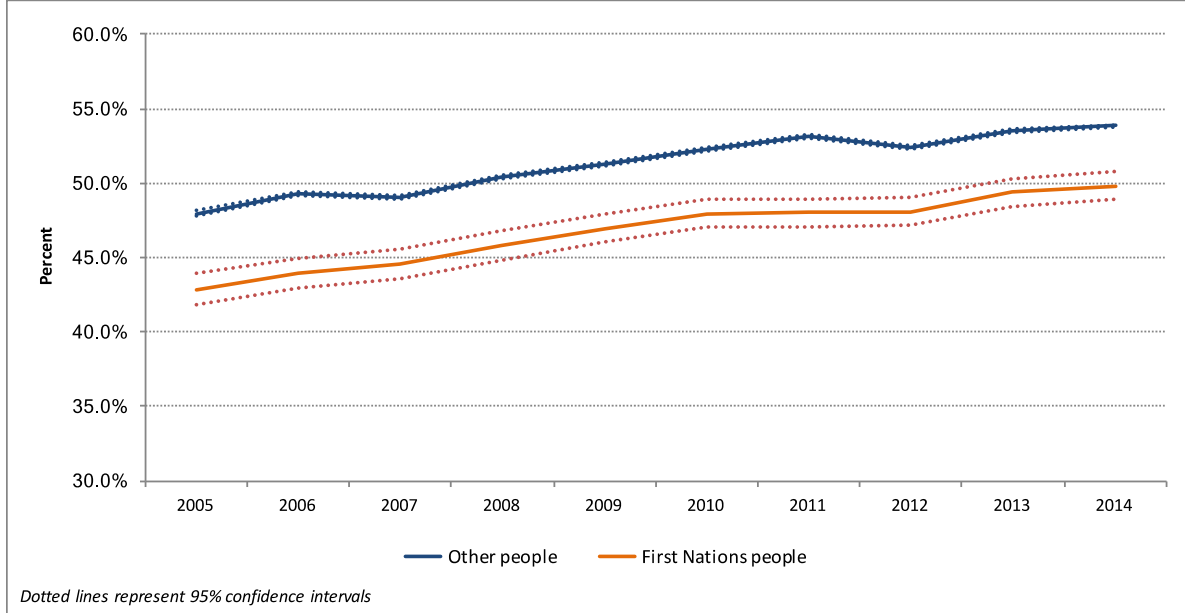

Dashed lines represent 95% confidence intervals.  
\* Because OHIP funding of eye examinations changed in 2004, the baseline year was set at 2005 to provide data consistency.

*Diabetes-Induced Eye Disease Among First Nations People in Ontario, Canada:  
A Longitudinal Population-Based Cohort Study*

**Figure 2** Age and sex-adjusted proportion of individuals with diabetes receiving any treatment for diabetic retinopathy, among First Nations people and other people in Ontario, 1995–2014

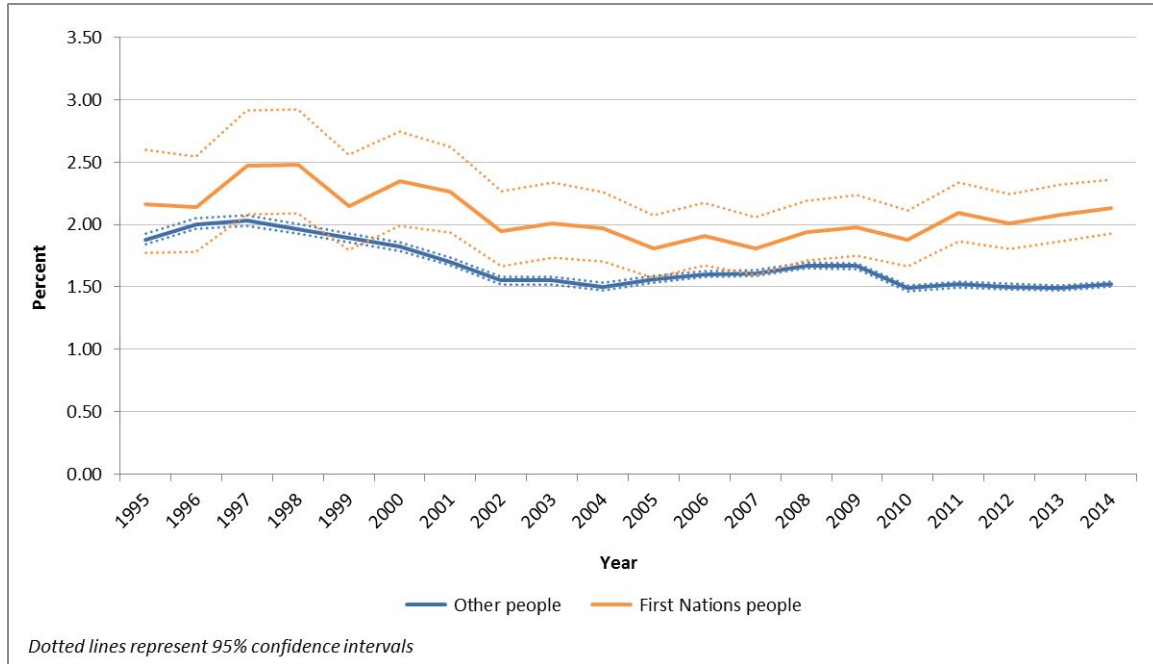

Dashed lines represent 95% confidence interval.

**Figure 3** Proportion of individuals with diabetes receiving therapy for diabetic retinopathy, among First Nations people and other people in Ontario, by age group, 2014

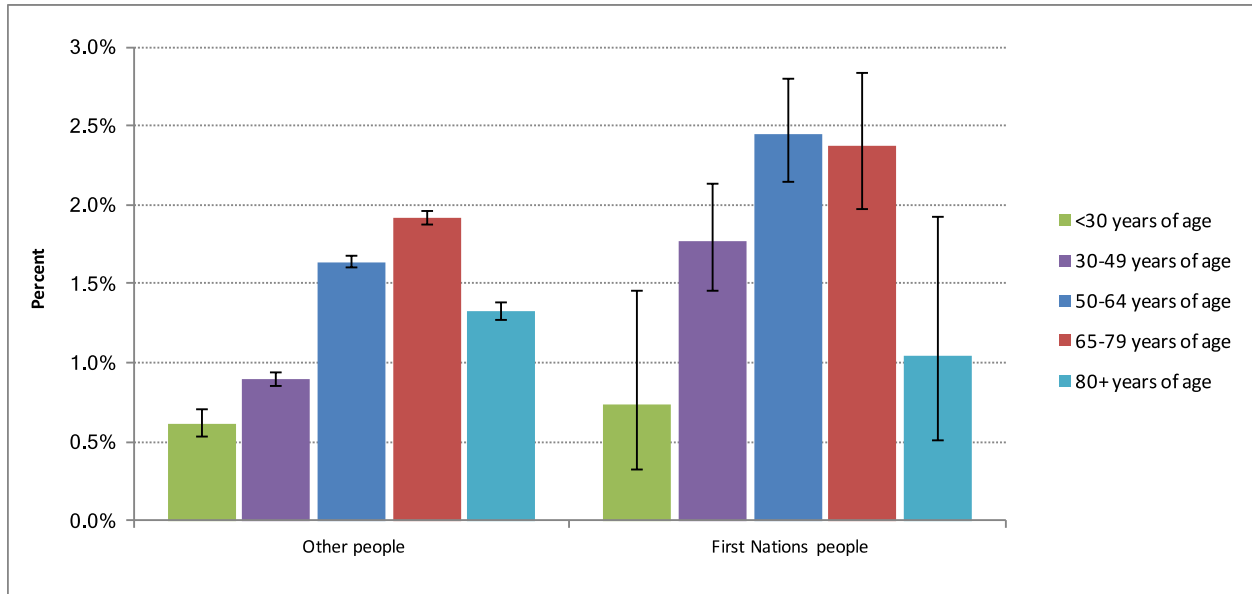

Error bars represent 95% confidence intervals.

*Diabetes-Induced Eye Disease Among First Nations People in Ontario, Canada:  
A Longitudinal Population-Based Cohort Study*

**Figure 4** Age- and sex-adjusted proportion of First Nations people and other people with diabetes undergoing treatment for diabetic retinopathy by time since diabetes diagnosis, 1995–2014\*

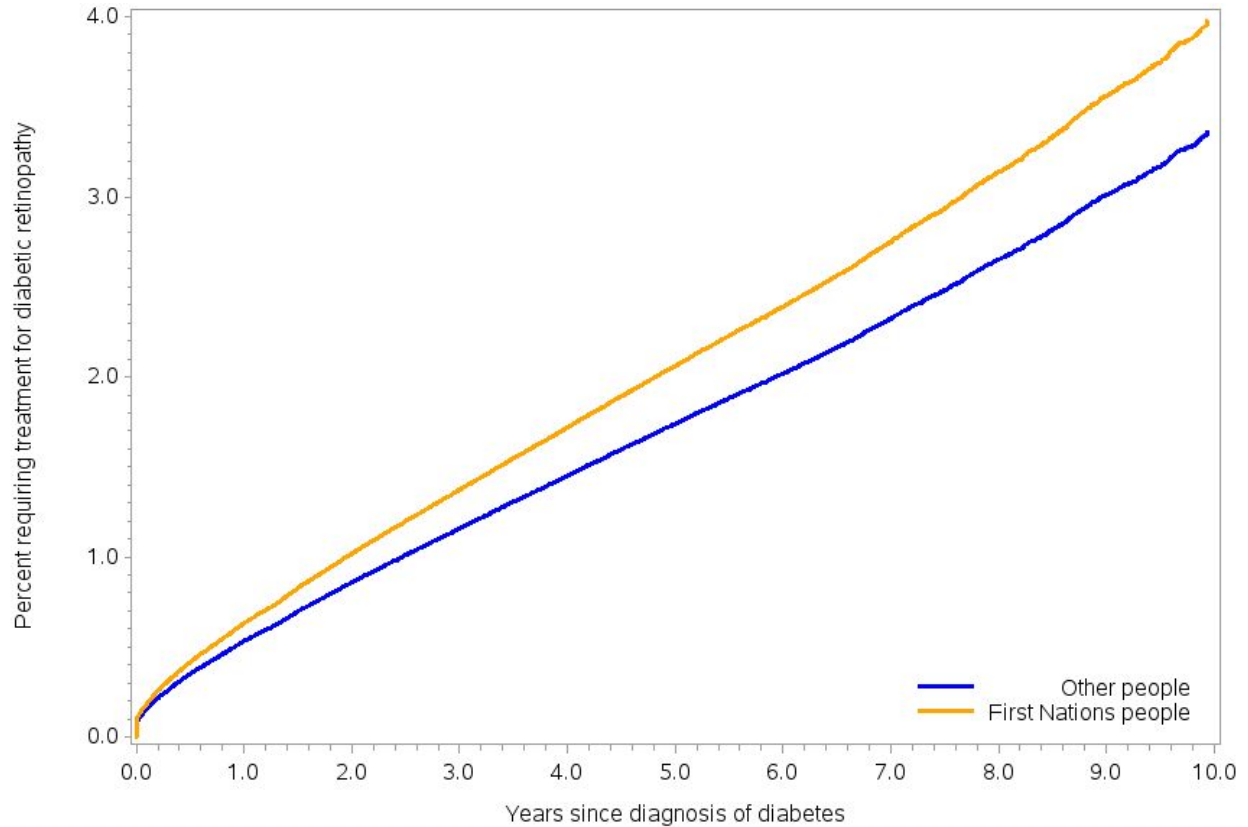

\*Includes intravitreal injection procedure, laser photocoagulation and vitrectomy.

*Diabetes-Induced Eye Disease Among First Nations People in Ontario, Canada:  
A Longitudinal Population-Based Cohort Study*

**Figure S1** Proportion of individuals with diabetes receiving an eye examination in the previous 2-years, among First Nations people and other people in Ontario, 2005–2014\*

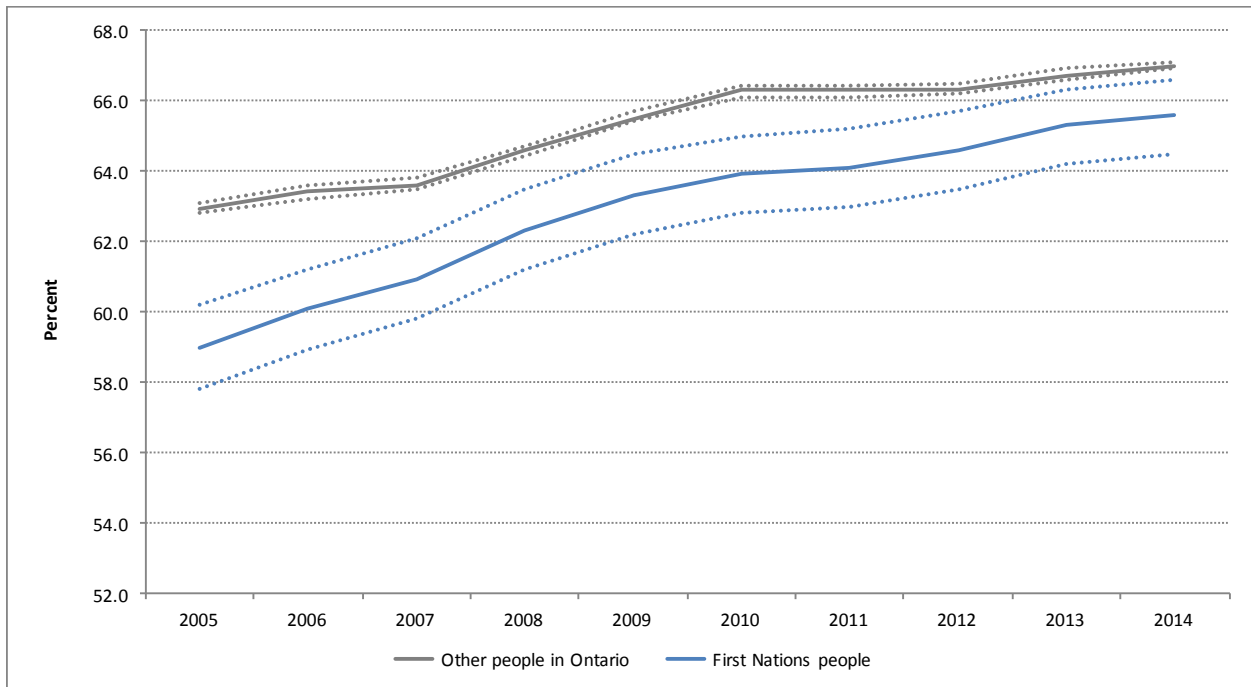

Dashed lines represent 95% confidence intervals.  
\* Because OHIP funding of eye examinations changed in 2004, the baseline year was set at 2005 to provide data consistency.



*Diabetes-Induced Eye Disease Among First Nations People in Ontario, Canada:  
A Longitudinal Population-Based Cohort Study*

**Figure S2** Proportion of individuals with diabetes receiving an eye examination, among First Nations people living in and outside of First Nations communities in Ontario, 2005–2014\*

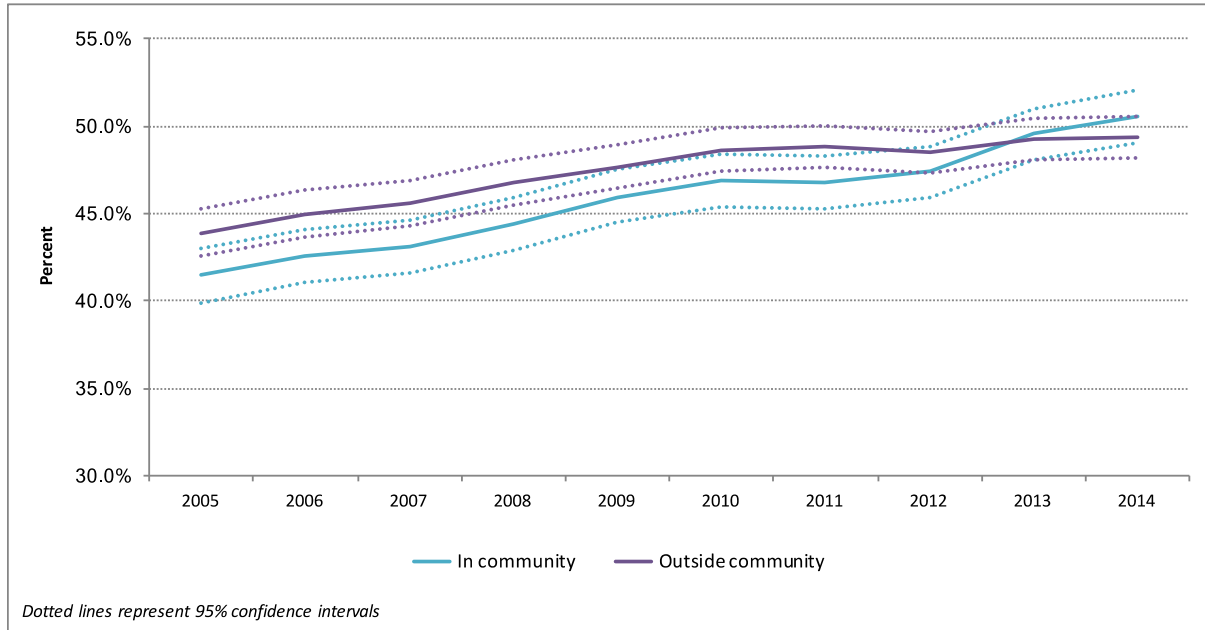

Dashed lines represent 95% confidence interval.

\* Because OHIP funding of eye examinations changed in 2004, the baseline year was set at 2005 to provide data consistency.

*Diabetes-Induced Eye Disease Among First Nations People in Ontario, Canada:  
A Longitudinal Population-Based Cohort Study*

**Figure S3** Percentage of First Nations people with diabetes and other people with diabetes receiving an eye examination by age, 2014.

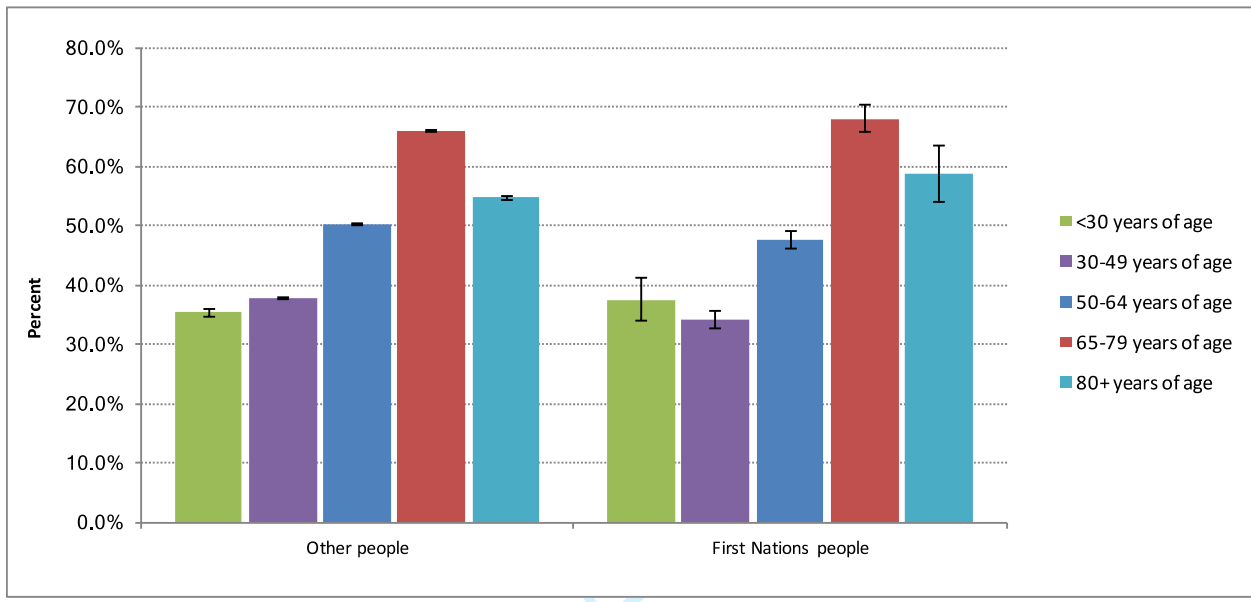

*Diabetes-Induced Eye Disease Among First Nations People in Ontario, Canada:  
A Longitudinal Population-Based Cohort Study*

**Figure S4** Proportion of individuals with diabetes receiving any treatment for diabetic retinopathy, among First Nations people living in and outside of First Nations communities in Ontario, 2001–2014

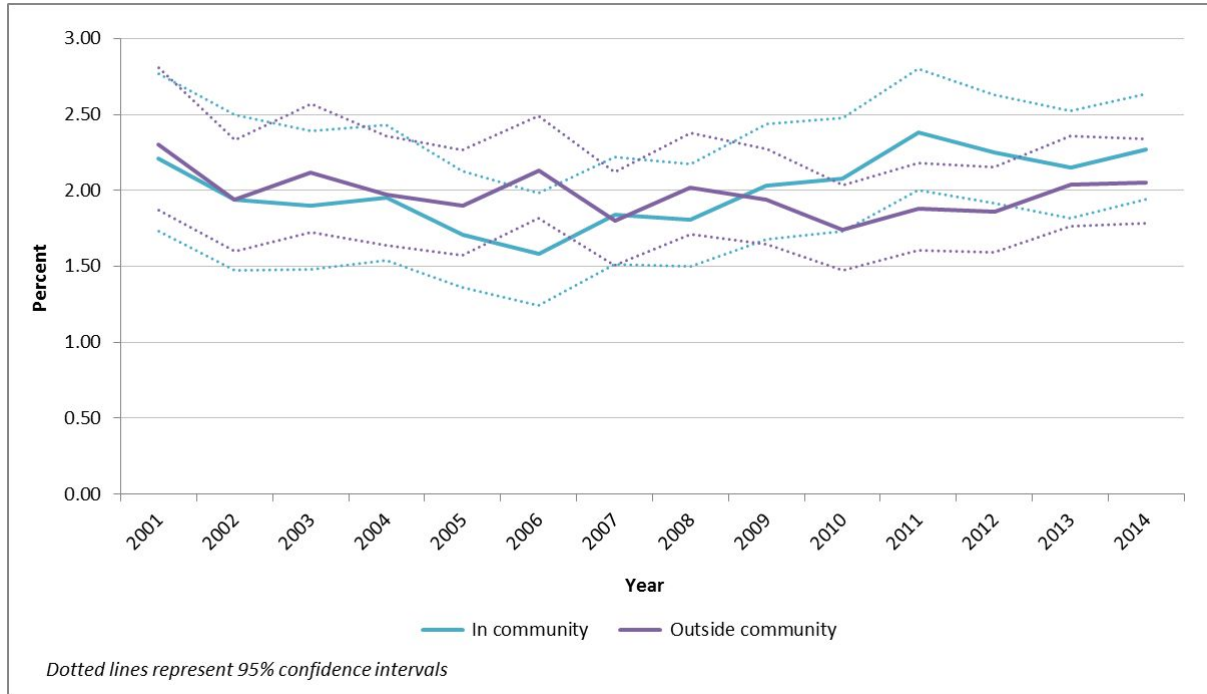

Dashed lines represent 95% confidence interval.
